# Supplementary material
Source: Springer Nature journal article supplement (https://www.springermedizin.de/resource/supplementary/13685_2013_27_MOESM1_ESM.pdf/9681254)
Supplement: MOESM1 [file 9681254]

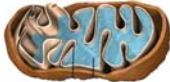

**REDOX STRESS**

**OXIDATIVE DAMAGE**

**REGULATORY CHANGES**  
Reversible (Pr-SG, Pr-SNO, ...)

**STRUCTURAL CHANGES**  
Irreversible (carbonyls, HNE, ...)

**INHIBITION**

**OXIDATIVE DAMAGE**

**Cell Dysfunction**

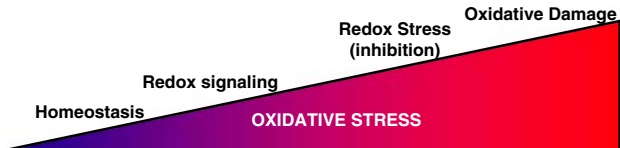

**HEALTH**

**PATHOLOGY**
